# Supplementary material for: UV–Vis and ATR–FTIR spectroscopic investigations of postmortem interval based on the changes in rabbit plasma
Source: PLoS One. 2017 Jul 28;12(7):e0182161. doi: 10.1371/journal.pone.0182161 (PMC5533326; doi:10.1371/journal.pone.0182161)
Supplement: S1 Dataset — The raw ATR–FTIR spectral data of postmortem rabbit plasma. (XLSX) [file pone.0182161.s001.xlsx]

## Sheet: Sheet1
	PMI(h)	Set	1799.29	1797.36	1795.43	1793.5	1791.57	1789.65	1787.72	1785.79	1783.86	1781.93	1780	1778.08	1776.15	1774.22	1772.29	1770.36	1768.43	1766.5	1764.58	1762.65	1760.72	1758.79	1756.86	1754.93	1753	1751.08	1749.15	1747.22	1745.29	1743.36	1741.43	1739.51	1737.58	1735.65	1733.72	1731.79	1729.86	1727.93	1726.01	1724.08	1722.15	1720.22	1718.29	1716.36	1714.43	1712.51	1710.58
formed elements	0	-	0.014971	0.01497	0.014831	0.014492	0.01459	0.014839	0.01528	0.015204	0.015422	0.015162	0.01528	0.015291	0.015398	0.015238	0.015564	0.015217	0.01564	0.015935	0.016276	0.01611	0.01644	0.016309	0.016605	0.016947	0.017449	0.01736	0.018288	0.018497	0.019427	0.019461	0.019824	0.019889	0.020602	0.020483	0.02123	0.021209	0.021762	0.021942	0.02239	0.022303	0.023136	0.023322	0.023673	0.024078	0.026505	0.027687	0.029761
plasma	0	calibration	-0.000121	0.000598	-4.8e-05	-0.000195	-0.00049	0.000259	0.00014	0.000961	0.00018	1.7e-05	-0.000481	0.000388	0.000293	0.000276	-0.000803	-0.000418	-0.000333	0.000889	0.000882	0.001209	0.000825	0.001119	0.00029	0.000974	0.000419	0.000492	-0.000988	-0.001669	-0.00191	8.5e-05	-0.000128	0.000928	-9e-06	-0.000384	-0.00131	-0.000495	-0.000431	0.001677	0.001266	0.001725	0.001291	0.003436	0.003315	0.003666	0.002383	0.003431	0.006258
plasma	0	calibration	-0.000929	0.000526	0.000504	-2.2e-05	-0.000875	-1.7e-05	-0.000126	0.001131	0.000332	-0.000207	-0.000942	-0.000297	-0.000335	0.001034	0.000768	0.000581	-0.000224	0.000504	7.1e-05	0.000604	0.000291	0.000417	0.000459	0.002132	0.00097	0.000158	-0.001302	-0.001468	-0.001454	2.7e-05	-0.001083	0.0004	0.000386	0.000732	-0.000517	-0.000695	-0.001067	0.001372	0.000978	0.002347	0.003375	0.004289	0.002377	0.001711	0.000447	0.003178	0.007527
plasma	0	calibration	-7.1e-05	-0.000287	-0.000999	-0.000261	-0.000142	0.000253	-0.000158	0.000756	0.000204	0.000197	-0.000407	0.000272	0.000394	0.000919	-0.000149	-0.000506	-0.0008	0.000858	0.00101	0.001645	0.000816	0.000453	0.000336	0.002274	0.001333	0.000185	-0.002491	-0.003233	-0.002843	-0.000135	-0.000298	0.000861	0.00084	0.001069	-0.000332	-0.000457	-0.001093	0.001154	0.001392	0.002492	0.002765	0.003822	0.002117	0.001796	0.000821	0.003492	0.007581
plasma	0	calibration	3.2e-05	0.000898	4.7e-05	-0.000479	-0.000924	9e-06	0.000165	0.001013	-0.000144	-0.000178	-0.000139	0.000876	0.000122	-9.4e-05	-0.000689	0.00024	0.000646	0.001665	0.00079	0.001085	0.00071	0.001048	0.001153	0.002308	0.000761	-0.000442	-0.002476	-0.002897	-0.002587	-0.000974	-0.0015	-0.000385	-0.000201	0.000705	2.5e-05	0.000144	-0.000315	0.001311	0.00113	0.002292	0.002338	0.003592	0.002689	0.003002	0.002241	0.00414	0.007688
plasma	0	calibration	-0.00079	0.00029	-0.000403	-0.00115	-0.001306	0.000557	0.001029	0.001355	7.6e-05	5.2e-05	0.000103	0.001622	0.000496	7e-05	-0.001644	-0.00187	-0.000874	0.001937	0.001384	0.002002	0.000375	6.2e-05	0.00088	0.002267	0.00059	0.000123	-0.001667	-0.001876	-0.001563	-0.000601	-0.000709	0.001653	-4e-05	-0.001048	-0.002573	-0.001797	-7e-06	0.003242	0.002275	0.003731	0.002755	0.00261	0.000747	0.001384	0.00236	0.006438	0.009107
plasma	0	calibration	-8.3e-05	0.000781	0.000414	-1.6e-05	-0.001023	-0.000211	0.000229	0.001341	0.000106	-0.000181	-0.00057	0.000658	-0.000147	-0.000169	-0.000828	-6e-06	0.000435	0.001541	0.000452	0.001316	0.001355	0.001897	0.001497	0.001599	0.000271	-0.000353	-0.00217	-0.00246	-0.002307	-0.00046	-0.000204	0.001045	-0.000717	-0.001263	-0.00209	-0.001073	-0.000196	0.002518	0.001991	0.004133	0.003806	0.002585	-0.000103	0.000511	0.001526	0.00601	0.009181
plasma	0	calibration	-0.000515	0.000243	-0.000113	-5.6e-05	-0.000321	0.00041	0.00016	0.000811	-0.000109	-0.000282	-0.000687	0.000283	0.00018	0.000669	-3.2e-05	2.7e-05	-0.000339	0.000796	0.00051	0.000988	0.00058	0.000634	0.000353	0.00169	0.000817	0.000279	-0.001322	-0.001739	-0.001765	-2.5e-05	-0.00057	0.000564	5.5e-05	0.000156	-0.000799	-0.000382	-0.000488	0.001516	0.001008	0.00202	0.002443	0.003804	0.002575	0.002276	0.001097	0.003136	0.006681
plasma	0	calibration	-9e-05	0.000784	-0.000133	-0.001054	-0.001492	-0.000264	0.000862	0.001988	0.000215	-0.00077	-0.000386	0.001362	0.001171	9.9e-05	-0.001834	-0.001645	-0.000252	0.001848	0.001484	0.001472	0.000808	0.000919	0.001582	0.003019	0.001342	-0.000484	-0.003117	-0.003802	-0.002973	-0.00075	-0.000472	0.001148	0.001096	0.000461	-0.001461	-0.001631	-0.000902	0.001832	0.002345	0.003787	0.004027	0.003901	0.001459	0.000627	0.000603	0.004402	0.008914
plasma	6	calibration	-0.000241	0.001036	0.000626	0.000282	-0.000725	-0.000647	-0.000601	0.000815	0.000205	8e-05	-0.000359	0.000447	-0.000182	0.000323	-6.4e-05	0.000121	0.000119	0.001331	0.000589	0.000999	0.000581	0.00057	0.000833	0.002513	0.001177	-8e-05	-0.002212	-0.002376	-0.001326	0.001117	0.000213	0.000336	-0.001455	-0.001567	-0.001491	4.9e-05	0.000519	0.002305	0.001006	0.001554	0.001665	0.00336	0.002699	0.002489	0.001381	0.002996	0.005871
plasma	6	calibration	-0.000555	-0.000468	-0.000196	0.001127	0.000862	0.000299	-0.001228	-0.000654	-0.000265	0.000503	-0.00013	-8.4e-05	-0.000365	0.000849	0.001098	0.001126	-0.000229	0.000214	0.000152	0.000992	0.001216	0.001221	8e-05	0.001206	0.000368	0.000509	0.000325	0.000337	-0.000753	-4.6e-05	-0.001909	-0.001799	-0.001838	-0.000356	-0.000245	0.000507	-0.00055	0.000513	0.000561	0.001602	0.000808	0.002835	0.003233	0.004582	0.003748	0.003056	0.003618
plasma	6	calibration	-0.000914	0.001433	0.000199	-0.001537	-0.00205	-0.000135	0.0014	0.003006	0.00033	-0.000789	-0.000302	0.001919	0.000827	-0.000185	-0.002461	-0.002243	9.8e-05	0.003634	0.002638	0.002397	0.000929	0.001137	0.003305	0.004399	0.000796	-0.002247	-0.005566	-0.005887	-0.003811	-0.001775	-0.001228	0.001921	0.00124	0.000227	-0.00205	-0.00223	-0.000393	0.003572	0.003056	0.005363	0.00439	0.002625	-0.000727	-0.001604	-0.000898	0.004734	0.008468
plasma	6	calibration	-0.001584	-0.001672	-0.001407	1.5e-05	0.000465	0.001316	0.000431	0.000355	-0.000855	-0.000414	0.000553	0.0019	5.4e-05	-0.0003	-0.001551	-0.000579	0.001156	0.00258	0.000481	0.000776	0.000565	0.001396	0.001957	0.002704	-0.000308	-0.001432	-0.002481	-0.002476	-0.00219	-7.3e-05	-0.000806	0.001321	0.000393	-0.000256	-0.001541	-0.000819	-0.00073	0.002226	0.001457	0.003137	0.003612	0.00399	0.001805	0.001277	0.000367	0.003718	0.006976
plasma	6	calibration	-0.000248	0.00072	0.000817	0.00106	-0.000123	-0.000816	-0.00181	0.00011	0.001195	0.00185	0.000577	0.000585	-0.000911	-0.000556	-0.000901	-0.000666	-0.001192	0.000416	0.00079	0.00211	0.001811	0.001904	0.001282	0.001863	-0.000156	-0.001242	-0.00284	-0.001722	-0.000313	0.001086	-0.000368	0.001238	-0.000187	-1.5e-05	-0.000344	-0.000469	-0.001092	0.001555	0.000891	0.003068	0.003352	0.002834	0.00077	0.001394	0.001656	0.005698	0.008786
plasma	6	calibration	-0.000899	0.000754	0.000147	-0.00067	-0.001593	-0.00085	7.7e-05	0.002315	0.000658	-0.000274	-0.000328	0.001343	0.000392	9.2e-05	-0.001884	-0.001588	0.000228	0.002753	0.00146	0.001344	0.000149	0.000583	0.002028	0.003523	0.000916	-0.001216	-0.003718	-0.00354	-0.001677	0.0011	0.00074	0.002367	0.000127	-0.001623	-0.003501	-0.002485	-0.000345	0.003928	0.002976	0.004616	0.00379	0.002652	-0.000298	-0.000827	-0.000242	0.005285	0.009127
plasma	6	calibration	-0.000294	0.001024	0.000313	-0.000222	-0.001026	-0.000503	-0.000191	0.001305	0.000537	0.000456	-0.000183	0.000558	-0.000314	-0.000113	-0.000847	-0.00054	-0.00019	0.0015	0.000798	0.001126	0.000453	0.000816	0.001474	0.002739	0.000626	-0.000975	-0.002872	-0.00216	-0.000594	0.001367	0.000213	0.001188	-0.000486	-0.001086	-0.001826	-0.000916	-0.000169	0.002615	0.001571	0.00279	0.002751	0.003093	0.001233	0.000978	0.000753	0.004305	0.00761
plasma	6	calibration	-0.000907	0.0002	-7.7e-05	-0.000136	-0.000571	0.000112	-3.8e-05	0.001131	0.000263	0.00023	0.000238	0.001438	-2.7e-05	-0.000345	-0.001581	-0.001159	-5.8e-05	0.002155	0.001343	0.001828	0.001146	0.001502	0.002197	0.003009	0.000127	-0.001698	-0.00377	-0.003439	-0.002061	-0.000164	-0.000764	0.0015	0.000484	2.3e-05	-0.001226	-0.00114	-0.00082	0.002377	0.001774	0.003892	0.003839	0.003156	0.000578	0.000306	0.000357	0.004766	0.008152
plasma	12	calibration	-0.000921	0.001567	-0.000348	-0.002728	-0.003344	-0.000948	0.001275	0.003602	0.000306	7.5e-05	0.001083	0.002528	0.000701	-0.001004	-0.004313	-0.003433	-0.000119	0.003496	0.002739	0.002303	-0.001174	-0.001638	0.001508	0.004487	0.002841	0.000243	-0.004405	-0.00485	-0.001766	0.001252	0.001487	0.004361	0.002039	-0.000554	-0.004396	-0.005076	-0.002173	0.00399	0.004439	0.00768	0.006458	0.003949	-0.002208	-0.004787	-0.003044	0.006203	0.012281
plasma	12	calibration	-0.000464	-0.000532	-0.00051	0.000825	0.000668	0.000522	-0.000357	-9.4e-05	-0.000229	0.000449	-8.4e-05	-0.000317	-0.000567	0.000502	0.000556	0.000967	-0.000331	-0.000534	-0.00026	0.00108	0.001016	0.001137	7.4e-05	0.001158	0.000871	0.000723	-0.00044	-0.000264	-0.001017	-8.9e-05	-0.000895	-0.000784	-0.000848	0.001178	0.001347	0.001325	-0.000288	-0.000362	-0.000517	0.001038	0.001121	0.002829	0.00273	0.003538	0.002749	0.003296	0.004669
plasma	12	calibration	-0.001339	-0.000182	0.000579	0.001735	0.000934	0.000139	-0.000837	-0.000107	8.1e-05	0.001039	0.000354	0.000478	-0.000336	-0.000506	-0.001306	-0.000474	-0.000373	0.001203	0.001157	0.001275	-0.000351	-0.000349	1.5e-05	0.002995	0.002357	0.000548	-0.002816	-0.00301	-0.000672	0.003626	0.002052	0.000256	-0.002418	-0.001906	-0.000336	0.001702	0.000528	0.00073	-0.000317	0.001353	0.002476	0.003832	0.002663	0.002122	0.000952	0.00372	0.00765
plasma	12	calibration	-0.000673	7.1e-05	-0.000813	-0.000707	-0.000997	0.000172	0.000772	0.001621	-0.000153	0.00018	0.000214	0.000942	-0.000584	-0.001029	-0.001195	0.000817	0.001596	0.002272	0.000354	-0.000128	-0.000599	0.000937	0.001917	0.002024	-0.00061	-0.000859	-0.001349	-0.00023	3e-05	-3.8e-05	-0.001435	0.000833	0.000105	-0.000591	-0.001979	-0.001345	-0.000471	0.002707	0.002493	0.004504	0.003587	0.00134	-0.001729	-0.000822	0.001033	0.006731	0.009973
plasma	12	calibration	-0.000666	0.000241	-0.00052	-0.000582	-0.000943	-5.4e-05	0.000354	0.001412	-3.5e-05	0.000311	0.000391	0.000886	-0.000211	-0.000377	-0.001326	-0.00033	0.000232	0.001338	0.000718	0.001091	-5e-06	0.000337	0.001033	0.002397	0.001038	0.000114	-0.001885	-0.001629	-0.000944	0.000332	-0.00036	0.001133	0.000278	0.000227	-0.001207	-0.001259	-0.000905	0.001679	0.001708	0.003928	0.003391	0.002751	4.4e-05	-0.000131	0.000565	0.00511	0.008363
plasma	12	calibration	-0.000832	0.000309	-0.000166	-0.000397	-0.000757	0.000226	0.000414	0.001364	0.000173	0.00022	9.5e-05	0.000747	-0.000438	-0.000278	-0.001251	-0.000747	5.3e-05	0.001689	0.000672	0.001066	-3.2e-05	0.000357	0.001186	0.002691	0.00081	-0.000185	-0.001855	-0.001478	-0.000928	0.000764	0.000192	0.001512	-5.1e-05	-0.000808	-0.001915	-0.000806	0.000249	0.00284	0.001772	0.003083	0.002701	0.002715	0.000249	9.7e-05	0.000423	0.00441	0.00756
plasma	12	calibration	-0.001208	-2e-05	0.000163	0.000559	0.000138	0.000408	3.6e-05	0.000805	-0.000104	0.0001	-3.5e-05	0.000653	-0.000237	-6.4e-05	-0.001046	-0.00065	-5.6e-05	0.001583	0.000811	0.000936	-0.00037	-6.5e-05	0.000801	0.002929	0.001481	0.000143	-0.002039	-0.001937	-0.000914	0.001611	0.000506	0.00099	-0.000389	-0.000808	-0.001451	-0.000373	-0.000196	0.002072	0.001391	0.002611	0.002529	0.003104	0.001246	0.000991	0.00065	0.003991	0.00741
plasma	18	calibration	-0.00066	0.000186	-0.000851	-0.001438	-0.001483	-0.000248	0.000302	0.001899	0.000357	0.000111	0.000381	0.001818	0.000551	-0.000302	-0.002156	-0.001989	-0.000434	0.002392	0.000946	0.001025	0.000366	0.000739	0.001793	0.003172	0.000281	-0.000776	-0.002232	-0.001957	-0.000494	0.001185	-0.000764	0.000736	3e-05	-0.000219	-0.001647	-0.001875	-0.001485	0.002465	0.002613	0.004259	0.003695	0.003194	0.000416	-3.3e-05	-0.000716	0.003367	0.008329
plasma	18	calibration	-0.001466	0.000286	2.5e-05	-0.000457	-0.001029	-0.000179	0.000227	0.001952	0.000681	0.000549	0.000433	0.001157	-0.00018	-0.000412	-0.002086	-0.001769	-0.000357	0.002037	0.001303	0.001765	1.1e-05	-0.000296	0.001134	0.003213	0.001504	0.00014	-0.002126	-0.00216	-0.000744	0.001254	0.00018	0.001519	0.000115	-0.000828	-0.002302	-0.001753	-0.000551	0.002864	0.002369	0.004703	0.004098	0.002393	-0.001108	-0.001808	-0.001332	0.004148	0.007863
plasma	18	calibration	-0.000459	0.000525	-0.00064	-0.001131	-0.001314	0.000228	0.001018	0.002069	-7.1e-05	-0.000136	0.000243	0.001213	2.2e-05	-0.000182	-0.001793	-0.001568	-0.000152	0.002147	0.001001	0.000793	-0.000841	-0.000329	0.001625	0.003437	0.001123	-0.000568	-0.002545	-0.002086	-0.000742	0.001387	0.000935	0.001982	0.000254	-0.000643	-0.002093	-0.001383	-0.000426	0.002118	0.001772	0.004215	0.003848	0.002874	-0.000573	-0.001185	-0.00035	0.004896	0.008497
plasma	18	calibration	-0.00048	-0.000783	-0.001052	-0.000254	-0.000219	0.000631	0.000134	0.000471	0.000526	0.00076	-0.000124	0.000522	2.7e-05	0.000268	-0.000488	-0.000518	-0.000977	0.000878	0.000793	0.001131	0.000642	0.000837	0.000517	0.001334	-0.000527	-0.00021	-0.000599	-0.000184	-0.000351	0.000302	-0.001673	0.00016	0.000385	0.001155	0.000551	0.000696	-0.00064	0.00121	0.00083	0.002157	0.002314	0.003083	0.001757	0.002146	0.001554	0.003655	0.006659
plasma	18	calibration	-0.000118	0.000115	-2.6e-05	0.000813	0.000592	0.000723	-0.001028	-0.001073	-0.00058	0.001102	0.001794	0.002965	-0.000136	-0.002483	-0.003358	-0.001197	0.00066	0.00261	0.000915	0.000287	-0.00026	0.000339	-0.000341	0.001192	0.001273	0.001295	-0.000596	-0.000864	-0.000801	0.001674	0.000401	0.000728	-0.000451	0.000212	-3.2e-05	0.000388	-0.000664	0.00118	0.000812	0.001692	0.000633	0.002462	0.002758	0.003633	0.002775	0.003623	0.005172
plasma	18	calibration	-0.000108	0.000443	-0.000766	-0.001203	-0.001141	0.000242	0.000132	0.001268	0.000283	0.000589	0.001109	0.002464	9.4e-05	-0.001636	-0.003304	-0.001959	0.000377	0.002892	0.00124	0.00109	-4e-05	0.000165	0.000577	0.002314	0.001073	0.000579	-0.001508	-0.001927	-0.001586	0.000573	-0.000298	0.001484	0.000778	0.000404	-0.001467	-0.001557	-0.001408	0.001872	0.001855	0.003694	0.003135	0.003305	0.000945	0.000845	0.000818	0.004728	0.008478
plasma	18	calibration	-0.00073	0.000208	-0.000489	-0.000727	-0.001038	0.000126	0.000562	0.001701	0.00035	0.00032	0.000228	0.001029	-3e-05	-0.00017	-0.001618	-0.001404	-0.000417	0.00181	0.001054	0.001182	-0.000202	-2.1e-05	0.001216	0.002891	0.000844	-0.000248	-0.001901	-0.001608	-0.000609	0.0011	1.9e-05	0.001342	0.000163	-0.000346	-0.001564	-0.000994	-0.000431	0.002234	0.001767	0.003924	0.003558	0.002699	-0.000248	-0.000652	-0.000257	0.004383	0.007874
plasma	18	calibration	-0.000399	7.6e-05	-0.000621	-0.00048	-0.000616	0.000451	0.000375	0.000988	-2.5e-05	0.000337	0.000424	0.001397	6.4e-05	-0.000508	-0.001807	-0.00126	-0.000237	0.001923	0.000975	0.000778	-0.000315	0.000142	0.0009	0.002364	0.000661	-5.9e-05	-0.001526	-0.001257	-0.000645	0.001153	9.9e-05	0.001232	0.000122	-3.5e-05	-0.000985	-0.00044	-0.000508	0.001702	0.001326	0.003157	0.002801	0.002858	0.000737	0.000688	0.000783	0.004295	0.007379
plasma	24	calibration	-0.000907	0.000278	-0.00054	-0.001624	-0.00189	0.000242	0.001241	0.002593	3e-06	-0.000965	-0.000378	0.001721	0.000359	-0.000525	-0.002523	-0.001815	0.000232	0.00257	0.000964	0.00078	-0.000411	0.000282	0.001888	0.002931	0.000644	-0.00041	-0.00175	-0.001225	-0.000394	0.000609	-0.000215	0.001773	0.000577	-0.000547	-0.002233	-0.00167	-0.000391	0.002727	0.002059	0.004153	0.004071	0.002852	-0.000925	-0.001928	-0.001093	0.004399	0.008324
plasma	24	calibration	-0.000149	0.001054	1e-05	-0.000464	-0.001034	-6.9e-05	0.000382	0.00138	0.00016	-0.000239	-0.000568	0.00057	0.000471	0.000571	-0.000488	-0.000329	-0.000678	0.000242	0.000418	0.001509	0.000963	0.001149	0.000692	0.001224	-9e-05	-0.00044	-0.001358	-0.000314	0.000117	0.0012	-0.000455	0.000115	-0.000304	0.000464	1.7e-05	0.000261	-0.000533	0.000881	0.000289	0.002513	0.003668	0.003368	0.00068	0.000166	-0.000111	0.003644	0.006969
plasma	24	calibration	-0.000413	0.00085	0.000305	9.5e-05	-0.000458	0.000378	0.000392	0.000968	-0.000407	-0.00039	-0.000375	0.000568	-0.000163	0.000105	-0.000402	0.000338	0.000227	0.001133	0.000581	0.000865	0.000148	0.001296	0.001883	0.002599	4.8e-05	-0.001473	-0.002545	-0.001178	-0.000664	0.00049	-0.000743	0.000241	6e-06	0.000403	-0.000362	0.000493	-9e-06	0.001285	0.000764	0.002016	0.001611	0.002935	0.002011	0.002404	0.001385	0.003168	0.00509
plasma	24	calibration	-0.000554	0.000219	-0.000335	-0.000466	-0.000973	3e-05	0.000318	0.001503	0.00031	-0.000226	-0.000494	0.000783	0.00015	-1.8e-05	-0.001198	-0.000705	-0.00019	0.001294	0.000653	0.000923	0.000203	0.000601	0.000655	0.001611	0.000444	0.000238	-0.000759	-0.000466	-0.000553	0.000588	-0.000304	0.00089	0.000248	0.000308	-0.000643	-0.000286	-0.000568	0.001293	0.000901	0.002624	0.002671	0.002905	0.001013	0.000907	0.000519	0.003375	0.006199
plasma	24	calibration	-0.000565	0.000514	-0.000215	-0.000549	-0.000915	0.00025	0.000562	0.00153	-1.8e-05	-0.000377	-0.000428	0.000719	1.4e-05	5e-05	-0.00091	-0.000367	0	0.001199	0.000491	0.000907	0.000241	0.000952	0.001443	0.002122	0.000124	-0.000692	-0.001691	-0.000784	-0.000326	0.000776	-0.000441	0.00068	0.00018	0.000188	-0.000798	-0.000257	-0.000441	0.001427	0.001046	0.00275	0.002773	0.002923	0.000853	0.000663	0.000379	0.003587	0.006414
plasma	24	calibration	-0.000582	0.000975	0.000135	-0.000312	-0.000643	0.000133	0.000219	0.001075	-0.000328	-0.000504	-0.000242	0.001835	0.001165	0.000456	-0.001884	-0.002262	-0.001007	0.002041	0.000889	0.000917	0.000692	0.001347	0.000455	0.001202	0.000699	0.000894	-0.000385	-0.001096	-0.002288	-0.000619	0.000201	0.002475	0.000895	0.000173	-0.001296	-0.001247	-0.001021	0.001759	0.001052	0.00452	0.005184	0.003894	0.000166	-0.001119	-0.001539	0.003983	0.008477
plasma	24	calibration	-0.000516	0.000592	-0.000328	-0.000819	-0.001104	0.000155	0.000593	0.001676	5.7e-05	-0.000423	-0.000399	0.001068	0.000372	0.000137	-0.001367	-0.00114	-0.000357	0.001441	0.000558	0.000947	0.000434	0.000956	0.001022	0.001703	0.000314	2.5e-05	-0.001059	-0.000783	-0.000758	0.000521	-0.000101	0.001323	0.000345	3.5e-05	-0.001065	-0.000716	-0.000677	0.001587	0.001119	0.003453	0.003845	0.003195	0.000229	-0.000471	-0.000506	0.003839	0.007457
plasma	24	calibration	-0.000657	0.000387	-0.000323	-0.00059	-0.000756	0.000464	0.000624	0.001438	-0.000199	-0.000503	-0.000396	0.000994	0.000168	7.4e-05	-0.001162	-0.000779	-6.4e-05	0.001623	0.000565	0.000692	0.000116	0.000998	0.001445	0.002162	0.000326	-0.000352	-0.00141	-0.000977	-0.000969	0.000241	-0.000308	0.001307	0.000497	5.6e-05	-0.001207	-0.000663	-0.000526	0.001708	0.001289	0.00323	0.003061	0.003009	0.000739	0.000406	9e-05	0.003662	0.006733
plasma	30	calibration	-0.000642	0.000272	0.000388	0.000668	-0.000342	-0.000199	-0.00041	0.000661	0.00038	-5.8e-05	-0.001047	-0.000393	-0.000185	0.000927	0.00056	0.000388	-5.2e-05	0.000861	0.000546	0.000867	0.000442	0.00081	0.000451	0.001296	0.000285	0.000332	-0.000405	-0.000364	-0.000965	0.000177	-0.000589	0.000424	0.00014	0.000517	-3e-05	0.000922	0.000442	0.001423	0.00044	0.00031	-0.000148	0.002221	0.002513	0.002932	0.001391	0.00163	0.003397
plasma	30	calibration	0.000159	0.001115	0.00019	0.000109	-0.000597	-0.000207	-0.000195	0.000873	0.000437	0.000505	-0.000296	-0.000126	-0.000695	0.000501	0.000483	0.00064	-0.000287	-9.8e-05	-0.000424	0.000361	4.3e-05	0.000737	0.000233	0.000513	-0.000377	-4.7e-05	-0.000107	0.001138	0.000637	0.00088	-0.000662	0.000238	0.00085	0.001953	0.00126	0.000967	-0.000786	0.000277	0.000196	0.000681	0.000122	0.001384	0.001676	0.003008	0.002188	0.002553	0.003564
plasma	30	calibration	2.4e-05	-0.000366	-0.002081	-0.001577	-0.000132	0.001245	0.000912	0.001619	-0.000259	-0.000354	-0.000262	0.001229	0.000775	0.000451	-0.001768	-0.001784	-0.000719	0.001638	0.000547	0.001103	0.001037	0.002027	0.002557	0.002466	-0.000295	-0.001389	-0.002825	-0.002112	-0.001209	-5.8e-05	-0.00045	0.002058	0.001116	0.000293	-0.001589	-0.001519	-0.000745	0.003261	0.002411	0.003546	0.00329	0.003369	0.001022	0.000668	-9.1e-05	0.003102	0.006569
plasma	30	calibration	0.000231	0.000812	0.000102	0.000122	-0.000685	-0.000153	-0.000146	0.000721	0.000209	0.000119	-0.000621	9.1e-05	-4.3e-05	0.000664	3.8e-05	0.000148	-0.000206	0.000648	0.000233	0.000592	0.000136	0.000737	0.000305	0.000845	-5.2e-05	0.000356	-4.5e-05	0.000526	-0.00023	0.000368	-0.000641	0.000622	0.000475	0.000963	0.000164	0.000573	-0.000167	0.001245	0.000508	0.000889	0.000445	0.001978	0.001913	0.002709	0.0019	0.002859	0.004473
plasma	30	calibration	0.000317	0.000767	-9e-06	0.000276	-0.000208	0.000278	-7.5e-05	0.000294	-0.000136	0.000275	-0.000382	0.000172	-7.3e-05	0.000449	-7.6e-05	0.000446	-0.000253	0.0003	4.1e-05	0.000505	3.3e-05	0.000738	5e-05	0.000602	-8.7e-05	0.000445	-7.4e-05	0.000648	5.1e-05	0.000795	-4.9e-05	0.000777	-0.000103	0.000488	0.000108	0.000738	8.4e-05	0.001131	0.000147	0.000926	0.000833	0.002328	0.002254	0.003186	0.002261	0.003248	0.004771
plasma	30	calibration	0.000555	0.000739	-0.00059	-0.000531	-0.000632	0.000275	0.000208	0.000938	2e-05	0.00011	-0.000343	0.000582	0.000215	0.000494	-0.000671	-0.000506	-0.000464	0.000835	0.000246	0.00068	0.000257	0.000994	0.00076	0.001057	-0.000234	-2.3e-05	-0.000603	0.000178	-0.000202	0.000363	-0.000524	0.001201	0.000772	0.00088	-0.000324	-0.00021	-0.000585	0.001778	0.001062	0.00186	0.001471	0.002297	0.001501	0.002135	0.00159	0.003432	0.005433
plasma	30	calibration	0.000134	0.00039	-0.000408	-0.000205	-0.000536	0.000198	7.6e-05	0.000826	-3.5e-05	-0.000157	-0.000625	0.000502	0.000451	0.000695	-0.000614	-0.000564	-0.000309	0.001196	0.000602	0.000855	0.000378	0.001021	0.000876	0.001423	4.8e-05	9.2e-05	-0.000731	-0.000424	-0.000872	4.3e-05	-0.000577	0.001222	0.000576	0.000375	-0.000793	-0.000158	-5.5e-05	0.002193	0.001143	0.001626	0.001312	0.002661	0.001814	0.002008	0.001171	0.002926	0.005302
plasma	30	calibration	6e-06	0.001219	-4.7e-05	-0.000933	-0.001828	-0.00103	-0.000296	0.001895	0.001462	0.001567	0.001068	0.001263	-0.001391	-0.001817	-0.001959	-0.000949	0.000341	0.00237	0.001334	0.00206	0.000636	0.000368	0.001287	0.002757	0.001139	-0.000706	-0.003538	-0.00293	-0.001243	0.00069	0.00037	0.00219	0.000353	-0.000637	-0.002548	-0.002136	-0.000474	0.003466	0.002907	0.004463	0.003216	0.002077	-0.001199	-0.001518	-0.000392	0.004598	0.007592
plasma	36	calibration	-0.00121	-0.000261	-0.000595	-0.000593	-0.00107	0.000269	0.000844	0.001814	0.000332	0.000102	2.8e-05	0.001786	0.001184	0.000124	-0.001891	-0.001825	-0.001217	0.000819	0.000237	0.000587	-0.000167	0.000397	0.001399	0.003073	0.001156	-0.00028	-0.002313	-0.001579	7.2e-05	0.002079	0.000451	0.002459	0.00222	0.001767	-3.5e-05	-0.0009	-0.001311	0.002349	0.001637	0.002083	0.001244	0.000212	-0.002016	-0.001363	-0.000708	0.004158	0.008843
plasma	36	calibration	0.000299	0.000627	-0.002053	-0.003609	-0.002953	0.000753	0.002794	0.003621	0.000275	-0.001013	-0.000969	0.001732	0.00121	0.000489	-0.002232	-0.002377	-0.000489	0.003023	0.001543	0.000892	-0.00137	-0.000903	0.001045	0.003419	0.001856	0.000336	-0.0022	-0.001996	-0.000928	0.000508	-4.9e-05	0.002194	0.001013	0.000168	-0.002138	-0.002057	-0.000238	0.003865	0.00282	0.005245	0.004566	0.003214	-0.000523	-0.001627	-0.001401	0.00496	0.009842
plasma	36	calibration	-0.001382	0.000576	0.000475	2.9e-05	-0.00087	-0.00019	0.000121	0.001248	-0.000162	-0.000367	-0.000749	0.000867	0.000831	0.001055	-0.000327	-0.000835	-0.000855	0.001448	0.000702	0.00046	-0.000845	-0.000223	0.000748	0.002118	0.000322	-9.7e-05	-0.000902	-0.000134	-0.000177	0.001015	0.000405	0.001936	0.001088	0.000413	-0.001452	-0.00077	-0.000538	0.001791	0.001623	0.003169	0.002556	0.00256	0.000125	0.000316	0.000704	0.004469	0.007712
plasma	36	calibration	-0.000407	0.000532	-0.000248	-0.00082	-0.00099	0.000504	0.000732	0.001182	-0.000161	-0.000281	-0.000422	0.001062	0.000505	0.000613	-0.000742	-0.000918	-0.000326	0.00162	0.000309	0.000238	-0.00099	-0.000346	0.000862	0.002281	0.000761	0.000284	-0.001027	-0.000455	-3.9e-05	0.001082	9.9e-05	0.001616	0.001073	0.00095	-0.000668	-0.00072	-0.000641	0.002029	0.001544	0.003205	0.002451	0.001643	-0.000749	-0.00055	-0.000154	0.004167	0.00785
plasma	36	calibration	-0.000603	0.000442	-0.000739	-0.001352	-0.001277	0.000648	0.00124	0.0019	-0.000214	-0.000583	-0.000609	0.001096	0.000603	0.000481	-0.001192	-0.001177	-0.000416	0.001967	0.001175	0.000916	-0.000599	-0.000206	0.000565	0.002181	0.000744	-4.2e-05	-0.001329	-0.000667	-0.000426	0.000776	-7.9e-05	0.001543	0.000827	0.000545	-0.001174	-0.000919	-0.00045	0.002345	0.001857	0.003603	0.002964	0.00258	6e-06	-4.4e-05	0.000282	0.004565	0.00781
plasma	36	calibration	-0.000675	0.00076	-0.000101	-0.000992	-0.001373	1.8e-05	0.000655	0.001851	0.000249	-2e-06	8.4e-05	0.001366	1.3e-05	-0.000347	-0.001989	-0.001635	-0.000131	0.002116	0.000839	0.001032	-0.000559	0.000219	0.001789	0.002774	0.000117	-0.000915	-0.002187	-0.000944	0.000226	0.001559	0.000756	0.002798	0.001203	-1.9e-05	-0.002334	-0.002159	-0.000707	0.003166	0.002471	0.004257	0.003221	0.001596	-0.001863	-0.001922	-0.000975	0.004508	0.009142
plasma	36	calibration	-0.000415	0.00018	-0.001135	-0.001314	-0.000689	0.001294	0.001312	0.001425	-0.000538	-0.000412	-0.000134	0.000987	-6.5e-05	-0.000213	-0.001446	-0.000734	0.000137	0.001838	0.001295	0.001305	2e-05	0.000209	0.000216	0.001557	0.000496	-0.000192	-0.001224	-0.000359	-0.000379	0.000704	-0.000458	0.000733	0.000318	0.000831	-0.000318	-0.000137	-0.000227	0.001891	0.001266	0.002861	0.002388	0.002369	0.000288	0.000534	0.000797	0.004375	0.006735
plasma	36	calibration	4.5e-05	0.000911	2.5e-05	-0.000812	-0.001097	0.0003	0.000518	0.001114	-0.000152	-0.000399	-0.000198	0.001373	0.000575	0.000551	-0.001006	-0.001405	-0.000773	0.001206	0.000507	0.00087	-0.000194	8e-05	0.000671	0.002029	0.000578	-2.9e-05	-0.001281	-0.00077	2.1e-05	0.001708	0.000824	0.002414	0.000899	-0.00018	-0.001935	-0.001703	-0.000658	0.00286	0.001966	0.003153	0.00275	0.002668	0.000549	4e-06	-0.000261	0.003913	0.008047
plasma	42	calibration	-0.001337	-0.000787	-0.000613	8.3e-05	0.000135	0.000816	4.7e-05	0.000492	1e-05	0.000497	0.000279	0.001209	-0.000214	-0.000246	-0.001019	-0.00089	-0.000518	0.00126	0.000695	0.001287	-0.000189	-0.000806	-0.000503	0.002134	0.002113	0.001473	-0.001137	-0.001753	-0.001391	0.000968	0.000441	0.001762	0.00128	0.001247	-0.000222	-0.000217	-0.00064	0.001535	0.001186	0.002128	0.00192	0.002834	0.000911	0.000288	-0.000303	0.003238	0.007967
plasma	42	calibration	-0.000546	0.000217	-0.000405	-0.000964	-0.001372	-0.000552	-0.000107	0.002228	0.001455	0.000977	-4.5e-05	0.000659	0.000637	0.00133	-0.000378	-0.000991	-0.001429	0.000151	-0.000241	-0.000384	-0.001892	-0.000953	0.000697	0.002639	0.001511	0.000814	-0.000518	8.4e-05	0.001042	0.002561	0.000879	0.002486	0.003195	0.003067	0.001293	0.000376	-0.000988	0.001593	0.000965	6.4e-05	-0.002098	-0.002661	-0.004535	-0.003729	-0.002651	0.002248	0.007136
plasma	42	calibration	-0.001747	-0.0003	-0.000812	-0.001192	-0.00136	0.000161	0.001203	0.0029	0.000505	-0.000247	-0.000234	0.001733	0.001025	-0.000433	-0.003172	-0.002196	-5.5e-05	0.002572	0.001535	0.000898	-0.000491	0.000184	0.000692	0.002326	0.001548	0.000595	-0.001772	-0.002326	-0.001421	0.001604	0.001569	0.003236	0.001222	-0.000223	-0.001535	-0.001393	-0.000852	0.002811	0.001712	0.002988	0.002569	0.001674	-0.001156	-0.00102	-0.000428	0.004908	0.009502
plasma	42	calibration	-0.000832	0.001198	-0.000185	-0.002059	-0.003032	-0.000792	0.001368	0.004305	0.001067	-0.000609	-5e-05	0.002593	0.001574	-0.000134	-0.004083	-0.004372	-0.001482	0.002825	0.002446	0.002153	-0.001125	-0.002004	0.000282	0.004051	0.003376	0.001525	-0.00294	-0.003951	-0.001853	0.001552	0.001788	0.005577	0.004082	0.001067	-0.002947	-0.004055	-0.002085	0.004296	0.003515	0.005087	0.004181	0.000804	-0.004762	-0.005353	-0.002937	0.006375	0.012891
plasma	42	calibration	-0.00196	0.000213	-0.000404	-0.001035	-0.000557	0.001101	0.002039	0.002963	-0.000756	-0.001875	-0.001655	0.000801	0.001303	0.001367	-0.00155	-0.001949	-0.000813	0.001555	0.001498	0.002428	-0.000261	-0.000522	0.001127	0.002753	0.001444	6e-06	-0.003007	-0.002959	-0.00148	0.000882	0.001238	0.004184	0.001901	-0.000609	-0.003529	-0.003339	-0.001005	0.003811	0.002911	0.006082	0.005699	0.002798	-0.001931	-0.002601	-0.000789	0.007068	0.01139
plasma	42	calibration	-0.001303	0.00094	-0.000165	-0.001918	-0.002699	-0.000584	0.001368	0.003765	0.000601	-0.000486	0.00016	0.002743	0.001599	-0.00051	-0.004306	-0.003722	-0.000457	0.003285	0.002086	0.001499	-0.001069	-0.000972	0.001268	0.003974	0.00242	0.000333	-0.00343	-0.003851	-0.001378	0.002265	0.002353	0.004769	0.002141	-0.000845	-0.00393	-0.003906	-0.001258	0.004599	0.003766	0.005638	0.004508	0.001413	-0.00382	-0.00474	-0.00274	0.005983	0.011953
plasma	42	calibration	-0.001162	0.0009	-0.000866	-0.002822	-0.00271	7.1e-05	0.002373	0.00451	0.000299	-0.001303	-0.000539	0.002254	0.001596	0.000322	-0.00353	-0.003704	-0.000911	0.002931	0.002184	0.001874	-0.00146	-0.001549	0.001465	0.004427	0.002735	-2e-06	-0.004252	-0.004122	-0.001198	0.00201	0.002352	0.005731	0.00318	-0.000176	-0.00399	-0.004446	-0.001385	0.005024	0.004006	0.006255	0.004769	0.000666	-0.005291	-0.005997	-0.002921	0.007201	0.013354
plasma	48	calibration	-0.000472	0.001267	0.000593	-0.000515	-0.001832	-0.000473	0.000705	0.002413	0.000318	-0.00078	-0.001177	0.00125	0.001187	0.000697	-0.001748	-0.001782	-0.000516	0.002249	0.001245	0.000724	-0.00114	-0.000659	0.000709	0.002367	0.00129	0.000801	-0.001153	-0.001438	-0.001332	0.000403	0.000688	0.00398	0.003115	0.001339	-0.001792	-0.00194	-0.000752	0.003188	0.001983	0.002908	0.001788	0.000968	-0.001987	-0.002356	-0.001731	0.004355	0.008991
plasma	48	calibration	-0.000273	0.000169	-0.000574	-0.001481	-0.0019	0.000465	0.001003	0.002104	0.000743	4e-05	-0.000608	0.000285	0.000145	0.001062	-0.000144	-0.000329	-0.00037	0.000178	-0.000714	-0.000208	-0.000785	0.000115	0.000727	0.00208	0.001004	0.000818	-0.000356	-0.000517	-0.000589	0.001438	0.000269	0.001733	0.002496	0.002174	0.000388	7.3e-05	-0.000743	0.001902	0.001932	0.001989	0.000183	-7.6e-05	-0.002214	-0.002068	-0.000896	0.004038	0.007566
plasma	48	calibration	-0.000796	0.001294	0.000585	-0.000875	-0.002343	-0.000874	0.000626	0.00298	0.001147	0.00034	-0.000422	0.001269	0.000785	0.000219	-0.002567	-0.002797	-0.001014	0.002849	0.002148	0.001128	-0.001433	-0.001148	0.001418	0.004047	0.001891	-4.9e-05	-0.00265	-0.002165	-1.8e-05	0.001864	0.000667	0.003615	0.001964	-0.000455	-0.003319	-0.003189	-0.000397	0.005487	0.003937	0.004328	0.002615	0.000645	-0.00316	-0.003982	-0.002868	0.004862	0.010779
plasma	48	calibration	-0.001949	-0.000752	-0.000766	-0.000646	-0.000925	0.000744	0.001341	0.001593	-0.000465	-0.000303	0.000336	0.002663	0.001446	-0.000491	-0.002559	-0.002004	-0.000796	0.001559	0.00052	0.000449	0.000204	0.000775	0.000685	0.001966	0.000872	0.00047	-0.000987	-0.001331	-0.001156	0.001043	0.000495	0.001757	0.00114	0.00149	4.9e-05	-0.000305	-0.00045	0.00201	0.001185	0.002081	0.00152	0.002096	0.000751	-3.8e-05	-0.001313	0.002196	0.00693
plasma	48	calibration	0.000479	0.002279	-0.00069	-0.002946	-0.002177	0.000231	0.001557	0.00347	-0.000117	-0.000655	0.000432	0.002681	0.002145	0.001137	-0.003233	-0.004429	-0.001535	0.003557	0.002999	0.001584	-0.001045	-8.4e-05	0.004189	0.006177	0.001363	-0.00288	-0.005977	-0.005549	-0.003042	-4e-06	0.000948	0.005199	0.003872	0.00105	-0.00257	-0.002296	0.000558	0.005623	0.004128	0.005846	0.00312	-0.001496	-0.006828	-0.007191	-0.004001	0.006004	0.01073
plasma	48	calibration	-0.000397	0.001011	7.9e-05	-0.001517	-0.002184	3.1e-05	0.001091	0.002705	0.000589	-0.000314	-0.000459	0.001273	0.000902	0.0007	-0.00191	-0.00217	-0.000828	0.0018	0.001008	0.000707	-0.001122	-0.000489	0.001579	0.003725	0.001482	-0.000271	-0.002495	-0.002118	-0.000201	0.002171	0.001048	0.003299	0.002196	0.000373	-0.00219	-0.002388	-0.000769	0.004055	0.003343	0.004131	0.002327	0.000608	-0.003254	-0.004135	-0.002868	0.004318	0.00963
plasma	48	calibration	-0.000468	0.001161	-0.000389	-0.002012	-0.001847	0.00055	0.001642	0.002827	-0.000241	-0.000826	9e-05	0.002508	0.001803	0.000545	-0.002991	-0.003457	-0.001279	0.002529	0.001844	0.001248	-0.000592	4.7e-05	0.002506	0.004525	0.001319	-0.001418	-0.003998	-0.003692	-0.00143	0.001483	0.001279	0.003941	0.002401	0.000626	-0.002133	-0.002391	-0.000471	0.004164	0.003253	0.004889	0.003201	0.000776	-0.003569	-0.004839	-0.003797	0.003814	0.009454
plasma	48	calibration	-0.000592	0.000756	-0.000719	-0.00147	-0.001492	0.000302	0.001307	0.002266	-0.00029	-0.000212	0.000455	0.002133	0.001171	0.000277	-0.002317	-0.002459	-0.000839	0.002088	0.001231	0.001071	-0.000125	0.000439	0.001949	0.003368	0.000934	-0.000877	-0.002935	-0.002594	-0.001471	0.000747	0.000753	0.003272	0.001945	0.000726	-0.001705	-0.001517	9.1e-05	0.00402	0.002695	0.003837	0.002267	0.000628	-0.002563	-0.002926	-0.002075	0.004148	0.008553
plasma	3	prediction	-0.00016	0.000736	-0.000429	-0.001051	-0.00175	-0.000323	0.000926	0.002655	0.001326	0.000189	-0.000701	0.000713	-0.000167	-0.000573	-0.002113	-0.001322	0.000645	0.003776	0.001928	0.001198	-9.3e-05	0.000592	0.001894	0.003844	0.001073	-0.001422	-0.004404	-0.003983	-0.00208	0.000606	8e-05	0.001362	-0.000626	-0.001207	-0.00284	-0.002255	-0.000361	0.003937	0.003471	0.005409	0.0043	0.002894	-0.000204	-0.000481	0.000261	0.005774	0.009428
plasma	3	prediction	-0.000669	0.000685	-0.001087	-0.002229	-0.001995	0.000262	0.001694	0.003322	0.000753	-0.000385	-0.000363	0.001804	0.000511	-0.000768	-0.003242	-0.002471	0.000323	0.004453	0.002585	0.00143	-0.000552	0.000258	0.002614	0.005021	0.001584	-0.001767	-0.005379	-0.004815	-0.00223	0.000311	-0.00013	0.001869	-4.4e-05	-0.001393	-0.003741	-0.003141	-0.0001	0.005041	0.004527	0.006509	0.005202	0.002728	-0.001958	-0.002533	-0.000611	0.007118	0.01176
plasma	3	prediction	-0.000547	0.000655	-0.000598	-0.001395	-0.001394	0.00015	0.000972	0.002353	0.000442	-9.8e-05	-0.000247	0.001144	0.000217	-0.000455	-0.001962	-0.001064	0.000398	0.002924	0.001727	0.001148	-9.7e-05	0.00073	0.002047	0.003461	0.000897	-0.001202	-0.003743	-0.003337	-0.001897	-6.2e-05	-0.000501	0.000915	-0.000496	-0.000897	-0.001979	-0.001146	0.000333	0.003349	0.002557	0.003817	0.003223	0.002872	0.000438	0.000453	0.000883	0.005127	0.008637
plasma	9	prediction	-0.000172	0.000838	5.3e-05	-0.000424	-0.000852	0.000324	0.000541	0.000958	-0.00037	-0.000229	-0.000397	0.001042	0.000527	0.000129	-0.001163	-0.000641	-0.000207	0.001504	0.0008	0.001155	0.000664	0.000984	0.000667	0.001458	0.000396	0.0002	-0.000882	-0.000708	-0.000912	9.6e-05	-0.000838	0.00054	-1e-06	0.00022	-0.000848	-0.000588	-0.000647	0.001576	0.00077	0.002175	0.002328	0.002986	0.001546	0.00153	0.001152	0.004133	0.006887
plasma	9	prediction	0.000467	0.000942	-0.000375	-0.000756	-0.000581	0.000325	-0.000326	9.1e-05	-0.000626	0.000127	0.0004	0.001775	0.000876	0.000508	-0.000758	-0.000855	-0.001107	0.001169	0.001119	0.001269	0.000669	0.001181	0.001055	0.001765	0.00035	-0.000285	-0.001526	-0.000668	-0.000462	-0.000139	-0.001012	0.000242	-0.001307	-0.00068	-0.000833	-0.000293	-8.9e-05	0.002233	0.001325	0.002491	0.001924	0.003158	0.0023	0.002706	0.002017	0.003806	0.005944
plasma	9	prediction	-0.000146	0.000628	7.9e-05	-0.000317	-0.001169	-3.6e-05	0.000362	0.001044	-0.000175	-0.000119	-0.000687	0.000581	0.000437	0.000406	-0.00023	0.000698	0.00058	0.001559	0.000553	0.000925	0.001246	0.002094	0.002271	0.002472	9.5e-05	-0.001186	-0.003171	-0.003286	-0.003269	-0.001942	-0.001442	0.000691	-0.00041	-0.000124	-0.000985	0.000199	0.001146	0.003132	0.001229	0.001901	0.001783	0.003524	0.002934	0.003061	0.001785	0.003605	0.006143
plasma	15	prediction	0.000429	0.000438	-0.000959	-0.000391	0.000222	0.001101	0.000511	0.000496	-0.000975	2.1e-05	0.000829	0.001521	-0.000547	-0.001082	-0.001797	-0.000683	0.000247	0.00228	0.001737	0.002304	0.001311	0.000891	0.000655	0.002082	0.000493	-0.000503	-0.002797	-0.003139	-0.002561	-0.000321	-0.000534	0.00097	-3.3e-05	0.000304	-0.000338	0.000166	-2.9e-05	0.002042	0.001484	0.003188	0.002579	0.003156	0.001573	0.001457	0.000557	0.002918	0.005789
plasma	15	prediction	-0.000107	0.000699	0.000369	0.000359	-0.000716	-0.00029	-0.000273	0.000799	9.1e-05	-0.000125	-0.000875	-0.000513	-0.000166	0.001541	0.001468	0.001207	-0.000483	-0.000637	-6e-06	0.00175	0.001438	0.001171	0.000433	0.001336	0.000167	-5e-06	-0.001294	-0.00148	-0.00213	-0.000904	-0.001156	0.000154	-0.000444	0.000406	0.000216	0.001298	0.000848	0.001408	0.000408	0.001864	0.001668	0.002803	0.001874	0.002344	0.001987	0.00401	0.006235
plasma	15	prediction	-0.001086	-0.000122	-0.000271	0.000302	0.000405	0.000902	0.000325	0.000682	-0.000269	-0.000142	-9.1e-05	0.001172	0.00018	-0.000116	-0.001119	-0.000684	-0.000175	0.0013	0.000414	0.000942	0.000252	0.000528	0.000577	0.001813	0.000615	0.000419	-0.000728	-0.000701	-0.000569	0.001166	0.000285	0.000662	-0.001301	-0.001837	-0.002077	-0.00011	0.000648	0.002268	0.001645	0.003297	0.002296	0.002197	0.000595	0.001548	0.002177	0.004812	0.005682
plasma	21	prediction	-0.000227	0.000606	-0.000474	-0.001127	-0.00133	-7.9e-05	0.000319	0.00178	0.000712	0.000467	5.8e-05	0.000754	-0.000237	-0.000299	-0.001589	-0.001183	-0.000341	0.001774	0.001429	0.001595	-0.00012	-0.000392	0.000418	0.002094	0.001062	0.000282	-0.001793	-0.001423	-0.000319	0.000843	0.000241	0.001736	0.000375	-0.000165	-0.001133	-0.000893	-0.000337	0.002204	0.001343	0.003029	0.003307	0.002518	-0.000514	-0.000985	-0.000691	0.003652	0.006912
plasma	21	prediction	-0.000312	0.001112	0.000134	-0.000902	-0.001113	5e-06	0.000291	0.001434	-7.6e-05	-8.2e-05	0.000304	0.001915	0.000512	-0.000746	-0.002719	-0.001802	7.1e-05	0.002715	0.001641	0.001167	-0.000365	0.000225	0.001295	0.00245	0.000686	-0.000325	-0.001896	-0.0013	-0.000437	0.000719	-8.1e-05	0.001926	0.000419	-0.000818	-0.002566	-0.001761	9.5e-05	0.003756	0.002362	0.003272	0.002727	0.002892	0.000809	4.9e-05	-0.00045	0.003374	0.006774
plasma	21	prediction	0.000388	0.001116	-0.000373	-0.001528	-0.001877	-0.000233	0.00063	0.002117	0.000718	0.000509	0.000131	0.000502	-0.000716	-0.000338	-0.001572	-0.001016	-0.000298	0.001428	0.001295	0.002061	0.000223	-0.000356	0.000223	0.001793	0.000813	0.000232	-0.001826	-0.001506	-0.000323	0.001147	0.000649	0.002354	0.000555	-0.000661	-0.002335	-0.001795	-0.000319	0.003042	0.002116	0.003234	0.002766	0.002421	0.000127	-0.000191	-0.000389	0.003587	0.007596
plasma	27	prediction	0.000188	0.001051	5e-06	-0.000484	-0.001289	-0.000192	0.000372	0.001342	0.000435	0.000572	-1.2e-05	0.000412	-0.000773	-0.0006	-0.001102	-0.000319	0.000219	0.001404	0.000475	0.000944	5.7e-05	0.000378	0.000474	0.001426	0.00053	0.000611	-0.00054	-0.000405	-0.000861	-4.2e-05	-0.00068	0.001123	0.000994	0.000994	-0.000685	-0.000736	-0.000858	0.001516	0.001451	0.003048	0.003041	0.003132	0.000662	0.000224	-0.000133	0.003216	0.006705
plasma	27	prediction	-0.000333	-0.0003	-0.001627	-0.001384	-0.000471	0.00081	0.000606	0.002122	0.000827	0.000318	-0.00121	-0.001252	-0.00083	0.000961	0.000441	0.000942	-0.000291	-0.000132	-0.000588	0.000265	0.000216	0.001291	0.001291	0.001702	0.000263	0.000309	-0.001516	-0.00109	-9.3e-05	0.001328	0.000244	0.002003	0.000886	0.000248	-0.001866	-0.002189	-0.001681	0.002925	0.00354	0.004491	0.002547	0.001235	-0.000769	0.000179	0.000738	0.005203	0.00969
plasma	27	prediction	-0.001352	0.000233	0.000385	0.000275	-0.000624	-0.000924	-0.00145	0.000225	-0.000209	0.001042	0.001781	0.002732	9e-06	-0.001965	-0.003933	-0.003257	-0.000709	0.003825	0.003461	0.003429	0.000459	-0.001118	-0.001521	0.000519	0.000582	0.001005	-0.000156	0.000103	-0.000633	7.1e-05	0.000156	0.00321	0.001226	-0.000462	-0.003024	-0.003467	-0.001483	0.003966	0.003191	0.005284	0.003766	0.001521	-0.001498	-0.000977	0.000507	0.006686	0.009999
plasma	33	prediction	-0.000431	0.000379	3.5e-05	-3.9e-05	-0.000643	0.000133	8.5e-05	0.001337	0.000322	-0.000115	-0.000721	0.000633	0.000204	-1.4e-05	-0.001391	-0.001058	-0.000575	0.001181	0.00102	0.001305	7.5e-05	4.3e-05	6.9e-05	0.001686	0.000767	0.000257	-0.001226	-0.000458	0.000329	0.001884	0.000267	0.001225	0.000292	0.000518	-0.000555	-0.000314	-0.000386	0.002142	0.001239	0.002651	0.002862	0.00293	0.00077	0.000709	0.000421	0.003891	0.007336
plasma	33	prediction	-8.7e-05	0.000365	-0.000677	-0.000447	-0.000492	0.000582	0.000362	0.001194	0.000154	0.000179	-0.000589	0.00025	-0.000383	-0.000152	-0.000914	-0.000447	-0.000271	0.001194	0.00077	0.001195	0.000428	0.000727	0.000219	0.000914	7.2e-05	-0.000168	-0.001379	-0.000207	0.000312	0.001518	2.5e-05	0.000647	-0.000114	0.000594	-0.00039	-0.000354	-0.000667	0.001733	0.001025	0.002115	0.002242	0.003339	0.002084	0.002187	0.001283	0.003746	0.006816
plasma	33	prediction	0.000678	0.001024	-0.000526	-0.000797	-0.000989	0.000178	2.2e-05	0.000559	-6.1e-05	0.000786	0.000379	0.000565	-0.000553	-0.000515	-0.000956	-0.000136	7.3e-05	0.001257	0.000721	0.000988	0.000379	0.000901	0.000278	0.000654	-0.000112	-0.000257	-0.001162	0.0001	0.000163	0.000952	-0.000304	3.2e-05	-0.000513	0.000741	-9.9e-05	-0.000119	-0.000506	0.001435	0.000897	0.001866	0.001692	0.003182	0.002478	0.00287	0.001884	0.00353	0.006004
plasma	39	prediction	-0.000327	-9.8e-05	-0.000185	0.001006	0.000695	0.000883	-0.000578	-0.000696	-0.000127	0.001182	0.000245	-7.9e-05	-0.001114	-0.000256	0.000347	0.001678	0.000628	-0.000132	-0.001091	0.000176	0.000389	0.001101	0.000121	0.00058	8.9e-05	0.001088	0.000488	0.000336	-0.000528	0.00099	0.000392	0.000981	4e-05	0.000641	0.000501	0.001694	0.000768	0.001169	-3.1e-05	0.000516	4e-05	0.00147	0.001144	0.002334	0.002027	0.003199	0.004768
plasma	39	prediction	-0.000606	-0.000187	0.000103	0.001846	0.001836	0.001486	-0.001011	-0.001795	-0.000948	0.000862	0.000461	0.000258	-0.001016	-0.000137	0.000924	0.002269	0.000621	-0.00081	-0.001955	-0.000362	0.000553	0.001275	-0.000658	-0.00076	-1.9e-05	0.002206	0.001801	0.001252	-0.000288	0.000622	0.000601	0.0014	0.000314	0.001176	0.001346	0.002241	0.001059	0.001194	-0.00054	-0.001055	-0.001478	0.000905	0.001525	0.003212	0.002438	0.002279	0.003512
plasma	39	prediction	-0.000608	0.000215	0.000197	0.001138	0.000699	0.000576	-0.000778	-0.000319	-2.3e-05	0.000923	0.000143	-0.000276	-0.001221	0.000125	0.000657	0.001743	0.000506	-0.000473	-0.001339	0.00014	0.000573	0.00122	-0.000299	-0.000153	4.9e-05	0.001672	0.001037	0.000609	-0.000419	0.000672	-2.3e-05	0.000788	0.000159	0.001144	0.00131	0.001946	0.000515	0.001003	-0.000491	-0.000397	-0.000243	0.002159	0.002137	0.002925	0.001964	0.003001	0.00546
plasma	45	prediction	-0.000716	4.4e-05	-0.00028	-0.000214	-0.000398	0.001648	0.001131	0.000354	-0.000568	3.9e-05	0.000619	0.002	0.000163	-0.00062	-0.001684	-0.000783	-0.000417	0.001307	0.000991	0.001482	-0.000325	-0.00072	-0.001646	3.4e-05	0.001514	0.003068	0.000988	-0.000328	-0.001521	0.000356	0.00137	0.001877	-0.001042	-0.000372	0.000795	0.002755	0.002316	0.001725	-0.000477	0.002488	0.001733	0.000967	-0.001	-0.000703	-0.000221	0.004339	0.006869
plasma	45	prediction	-0.001934	0.00072	0.001503	0.001598	-0.000186	-0.000732	-0.000733	0.001347	0.001743	0.001633	-0.00103	-0.001584	-0.000726	0.000969	0.000586	-0.000128	-0.000827	0.000843	0.000494	-0.000524	-0.002035	-0.001144	0.000701	0.003348	0.002512	0.000712	-0.000975	-0.000544	-0.000448	0.000927	4.3e-05	0.001199	0.000773	0.000558	0.000318	0.001144	0.000271	0.001629	0.000295	0.000725	0.001982	0.00305	0.000855	0.000971	0.001304	0.004526	0.007936
plasma	45	prediction	0.000402	0.001448	0.00049	-0.000445	-0.001295	-0.000176	-0.000312	0.000687	0.000611	0.000783	0.000139	0.000988	0.000275	0.000367	-0.000306	-0.000345	-0.000917	0.000164	0.000338	0.001054	0.000152	-0.000135	-0.001303	-0.000408	0.000435	0.002461	0.00194	0.00155	-0.000415	-0.000434	-0.000875	0.001112	0.001035	0.001901	0.0008	0.001003	0.000613	0.001602	4.6e-05	0.000417	-0.000187	0.001307	0.001347	0.001643	0.000351	0.001661	0.002953
[truncated: 420 more columns]
