# Supplementary material for: UV–Vis and ATR–FTIR spectroscopic investigations of postmortem interval based on the changes in rabbit plasma
Source: PLoS One. 2017 Jul 28;12(7):e0182161. doi: 10.1371/journal.pone.0182161 (PMC5533326; doi:10.1371/journal.pone.0182161)
Supplement: S2 Dataset — The absorbance values of UV-Vis spectra at 414 nm. (XLSX) [file pone.0182161.s002.xlsx]

## Sheet: Sheet1
PMI	A414
0	0.004
0	0.01
0	0.011
0	0.012
0	0.012
0	0.02
0	0.021
0	0.022
6	0.029
6	0.031
6	0.032
6	0.033
6	0.06
6	0.068
6	0.096
6	0.137
12	0.068
12	0.073
12	0.082
12	0.109
12	0.116
12	0.274
12	0.216
12	0.184
18	0.202
18	0.221
18	0.228
18	0.234
18	0.252
18	0.335
18	0.404
18	0.325
24	0.235
24	0.27
24	0.308
24	0.357
24	0.409
24	0.543
24	0.362
24	0.503
30	0.374
30	0.441
30	0.496
30	0.536
30	0.644
30	0.692
30	0.804
30	0.408
36	0.534
36	0.521
36	0.869
36	0.757
36	0.677
36	0.613
36	0.774
36	0.729
42	0.648
42	0.831
42	0.832
42	0.719
42	0.579
42	0.775
42	0.794
42	0.749
48	0.664
48	0.822
48	0.432
48	0.767
48	0.781
48	0.425
48	0.801
48	0.792
